# Supplementary material for: Risk Assessment and Sources Apportionment of Toxic Metals in Two Commonly Consumed Fishes from a Subtropical Estuarine Wetland System
Source: MDPI journal article supplement (doi:10.3390/biology13040260), 2024-04-14
Supplement: s1 [file s1]

## Supplementary tables

# Risk Assessment and Sources Apportionment of Toxic Metals in Two Commonly Consumed Fishes from a Subtropical Estuarine Wetland System

**Table S1.** MDLs (mg/kg) for EDXRF (Epsilon 5) and comparative values of the measured and certified concentrations of standard reference materials (Marine sediment, IAEA 433).

| Elements | MDL<br>(mg/kg) | Measured<br>Conc. (mg/kg) |      | Certified<br>Conc.<br>(mg/L) | RE<br>(%) | CV (%) |
|----------|----------------|---------------------------|------|------------------------------|-----------|--------|
|          |                | Mean                      | SD   |                              |           |        |
| Cr       | 0.89           | 76.96                     | 0.33 | 77.2                         | 0.32      | 0.43   |
| Cu       | 0.24           | 30.63                     | 0.34 | 32.7                         | 6.33      | 1.11   |
| Zn       | 0.32           | 72.66                     | 0.87 | 74.8                         | 2.87      | 1.20   |
| Pb       | 0.55           | 22.45                     | 0.08 | 22.3                         | 1.54      | 0.38   |
